# Supplementary material for: Cross-linked conjugated polymer assemblies at the air–water interface through supramoleculer bundling
Source: Royal Society of Chemistry journal article supplement (doi:10.1039/c3dt51468d), 2013-01-01
Supplement: c3dt51468d.pdf [file c3dt51468d.pdf]

Supplementary Information for

## **Cross-Linked Conjugated Polymer Assemblies at Air-Water Interface through Supramolecular Bundling**

Rie Wakabayashi,<sup>a</sup> Hiroshi Endo,<sup>b</sup> Seiji Shinkai,<sup>c,d</sup> Katsuhiko Ariga<sup>b</sup>  
and Masayuki Takeuchi\*<sup>e</sup>

<sup>a</sup>*Department of Applied Chemistry, Graduate School of Engineering, Kyushu University, Motoooka 744, Nishi-ku, Fukuoka 819-0395, Japan.*

<sup>b</sup>*Supramolecules Group, National Institute for Materials Science (NIMS), 1-1 Namiki, Tsukuba 305-0044, Japan.*

<sup>c</sup>*Institute for Advanced Study, Kyushu University, Fukuoka 819-0395, Japan.*

<sup>d</sup>*Institute of Systems, Information Technologies and Nanotechnologies (ISIT), Fukuoka 819-0385, Japan.*

<sup>e</sup>*Organic Materials Group, National Institute for Materials Science (NIMS), 1-2-1 Sengen, Tsukuba 305-0047, Japan.*

E-mail: [Takeuchi.Masayuki@nims.go.jp](mailto:Takeuchi.Masayuki@nims.go.jp)

## Experimental

### Materials.

All starting materials and solvents were purchased from Tokyo Kasei Chemicals or Wako Chemicals and used as received. **CP** ( $M_w = 48$  kDa, average number of repeating units  $n = 73$ ) and compound **1** were synthesized with the reported procedure.<sup>1</sup> **CP-1** complex was formed by adding a chloroform solution of **1** ( $7.3 \mu\text{M}$ ) to a chloroform solution of **CP** ( $75.1 \mu\text{M}$ /repeating unit). Water used for the subphase was distilled and deionized using an ELGA PURELAB Life Science (resistivity  $> 18.0 \text{ M}\Omega\cdot\text{cm}$ ). Spectroscopic grade chloroform was used as the spreading solvent.

### Other measurements.

Pressure-area ( $\pi$ -A) isotherms were measured at  $20.0 \text{ }^\circ\text{C}$  using an USI system FSD-300 Langmuir trough equipped with a Wilhelmy type surface pressure sensor. Compression was commenced at a rate of  $0.2 \text{ mm/s}$  10 min after spreading chloroform solutions of samples. Temperature of the sub-phase was controlled within  $20.0 \pm 0.2 \text{ }^\circ\text{C}$ . *In situ* UV-Vis spectra were measured with an Otsuka intensified multichannel photodetector MCPD-7000 equipped with an optical fiber. LB films were prepared using a vertical dipping method with up-stroke and down-stroke motions of  $10 \text{ mm/min}$  on a quartz substrate or a silicon wafer. AFM measurements of transferred films on silicon wafers were conducted with SII SPA-400 (tapping mode) using SII SF-D20 ( $16 \text{ N/m}$ ,  $137 \text{ kHz}$ ).

### Molecular models of adjacent polymer packing of CPs.

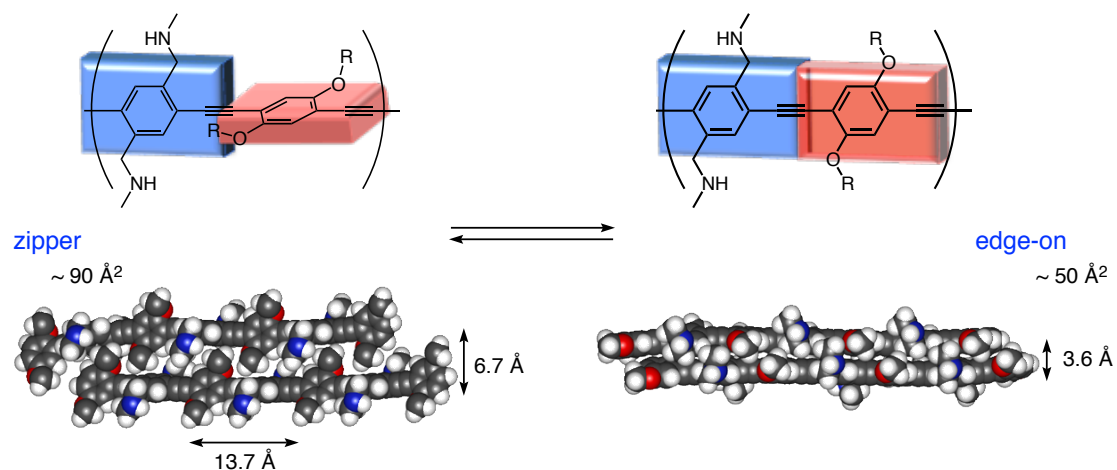

**Fig. S1** Molecular models of adjacent polymer packing of CP.

### In situ UV-Vis. spectra of CP and CP-1 under compression.

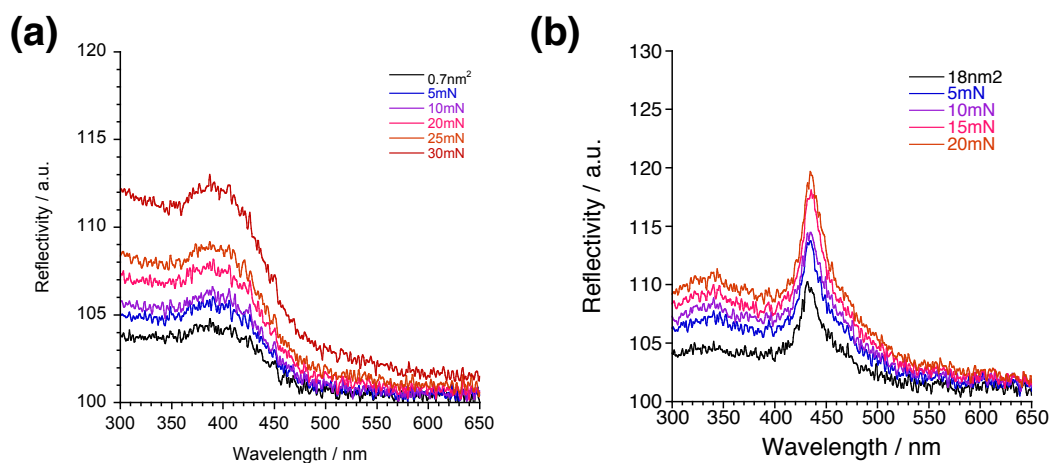

**Fig. S2** In situ UV-Vis. spectra of (a) CP and (b) CP-1 under compression.

### Pressure–area isotherms of **1**.

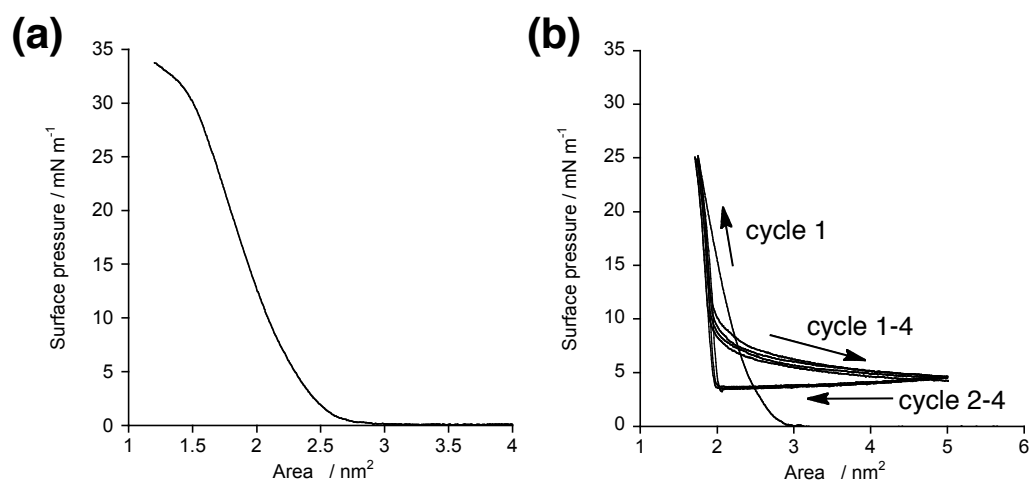

**Fig. S3** Pressure–area isotherms of **1** (left: first compression, right: cyclic measurements).

**Comparison of UV-Vis. spectra of CP-1 at air-water interface and in a chloroform solution.**

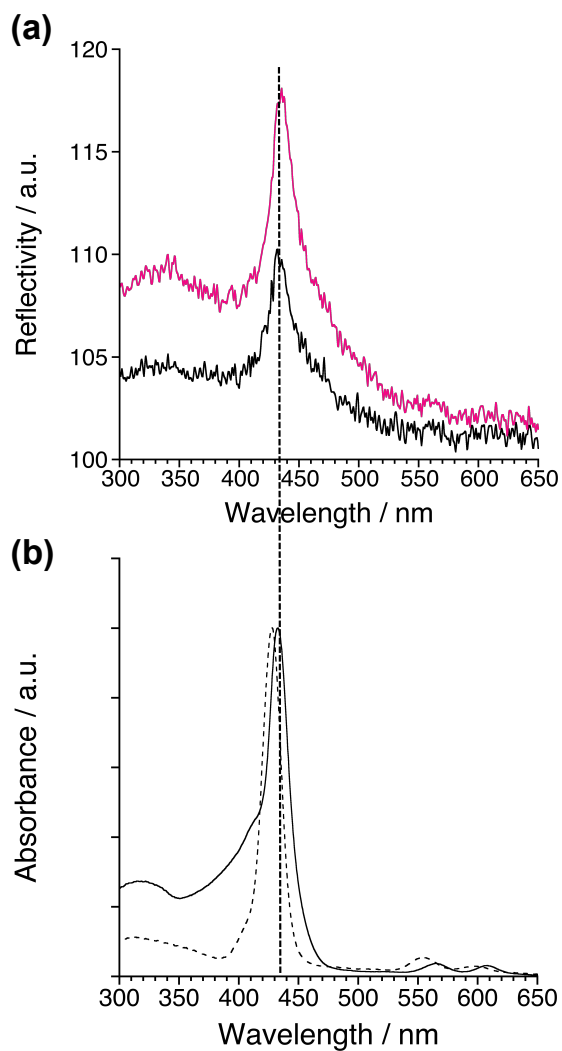

**Fig. S4** (a) *in situ* UV-Vis. spectra of **CP-1** before (black) and after (pink) compression and (b) UV-Vis. spectra of **1** (dashed) and **CP-1** (solid) in chloroform. The absorption maximum wavelengths are 435 nm (a), 433 nm (b, solid) and 428 nm (b, dashed).

### Polarized UV-Vis spectra of CP and CP-1.

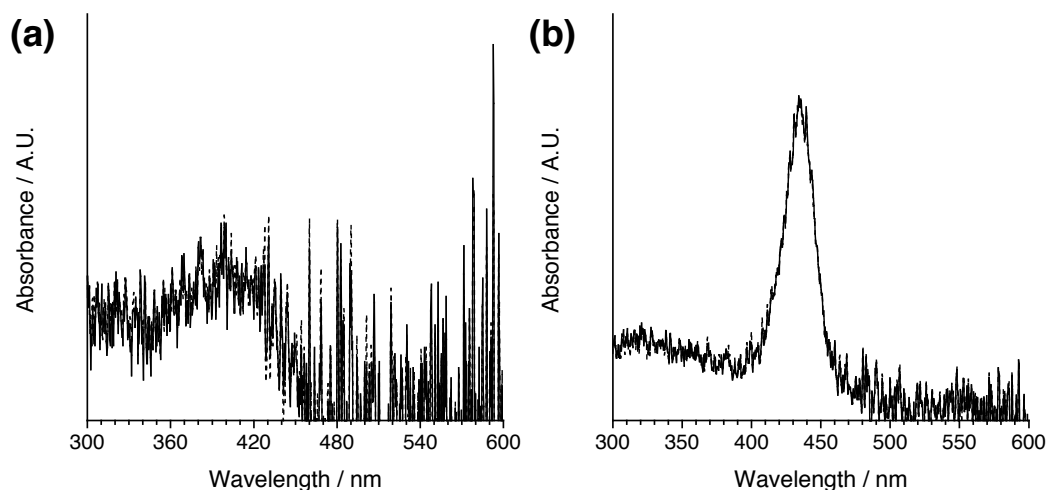

**Fig. S5.** Polarized UV-Vis spectra of (a) **CP** and (b) **CP-1** (dashed; perpendicular, solid; parallel to the dipped direction).

### Fluorescence spectra of CP and CP-1.

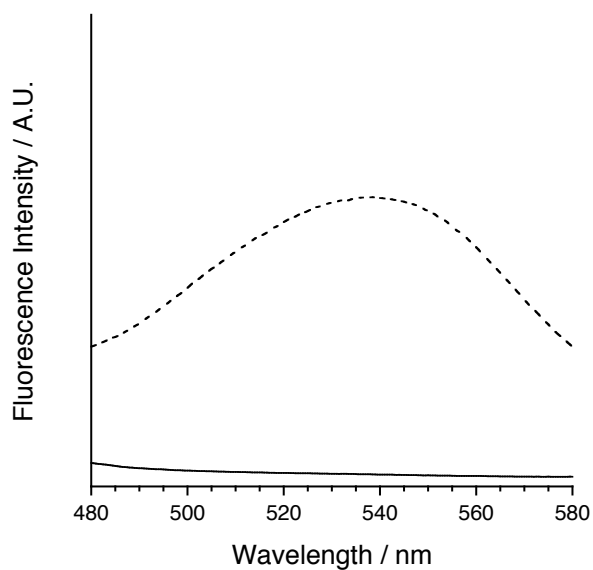

**Figure S6.** Fluorescent spectra on a quartz cell of **CP** (dashed) and **CP-1** (solid).

### References.

- 1) Kubo, Y.; Kitada, Y.; Wakabayashi, R.; Kishida, T.; Ayabe, M.; Kenji, K.; Takeuchi, M.; Shinkai, S. *Angew. Chem. Int. Ed.* **2005**, *45*, 1548–1553.
